# Supplementary material for: Synthesis and antiproliferative activity of 2-oxo-3-phenylquinoxaline derivatives and related compounds against colon cancer
Source: Royal Society of Chemistry journal article supplement (doi:10.1039/d4ra06822j), 2024-01-01
Supplement: d4ra06822j1.pdf [file d4ra06822j1.pdf]

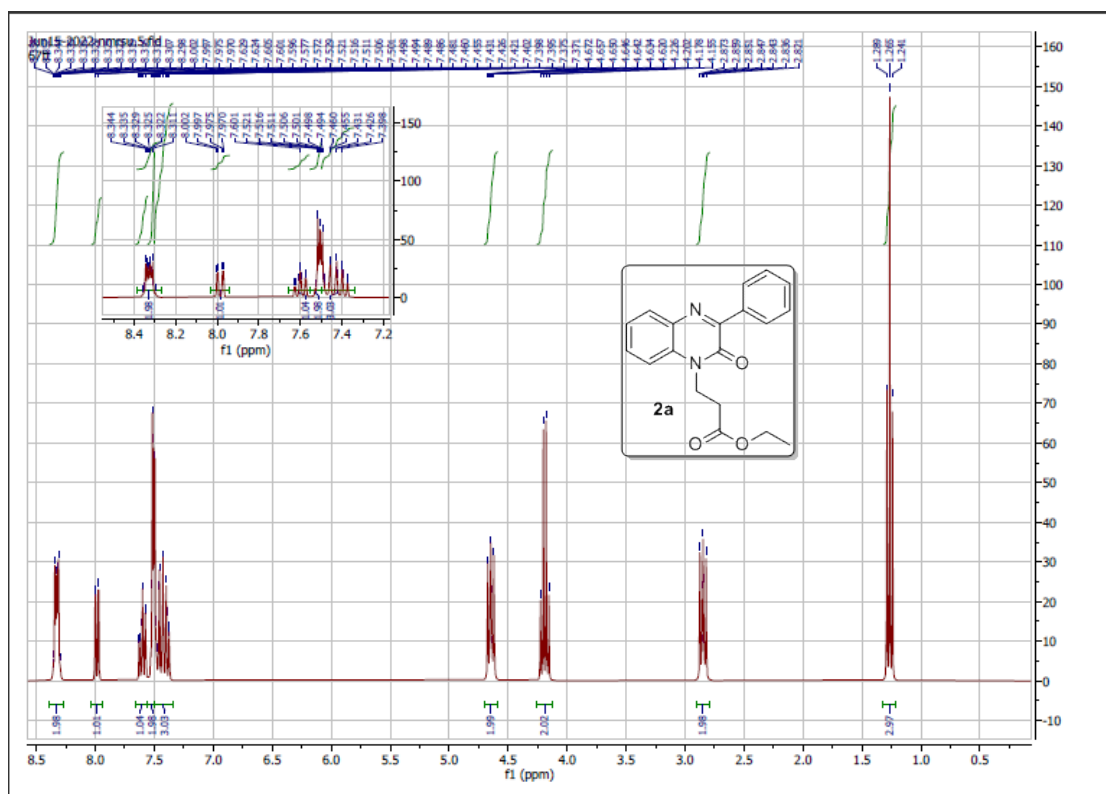

S1 <sup>1</sup>H NMR spectra of 2a

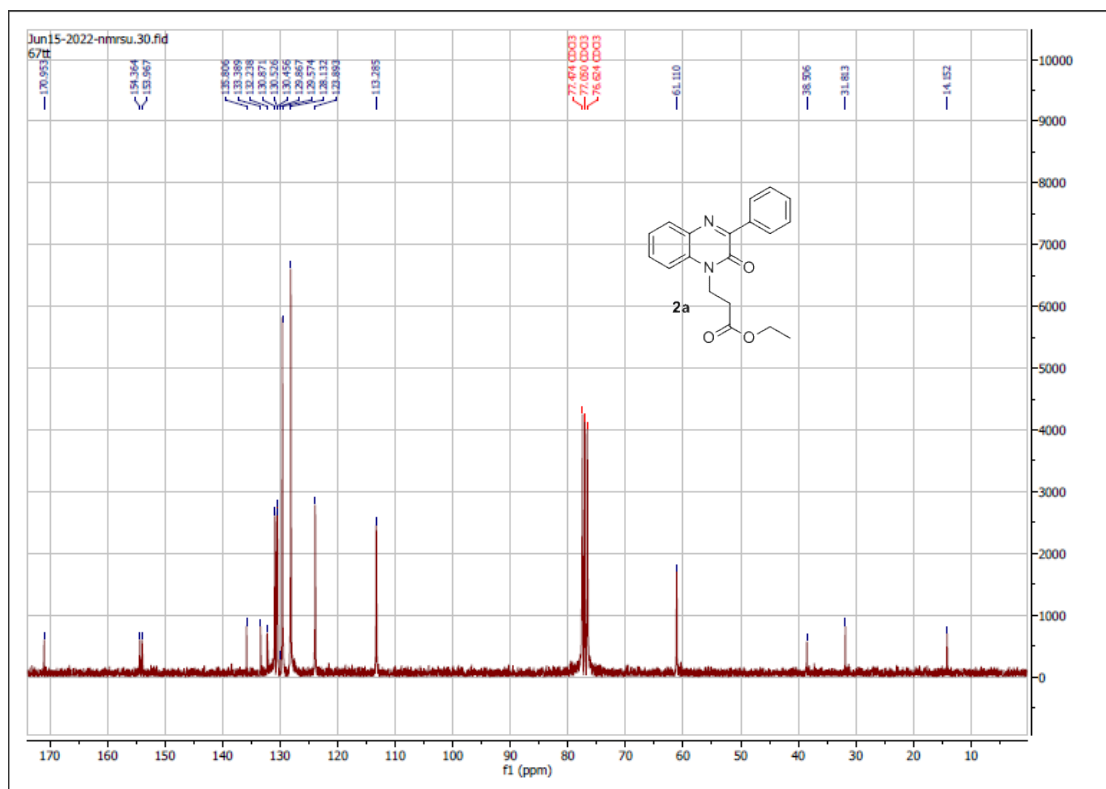

S2 <sup>13</sup>C NMR spectra of 2a

Kratos Kompact MALDi 2 V5.2.4:+ Linear Low Power 134,P.Ext@5000(bin 544)  
100% = 22mV[sum=2154mV] Profiles 1-97 Smooth Sv-GI 1-Baseline 100

POS DHB ibrahim 2a

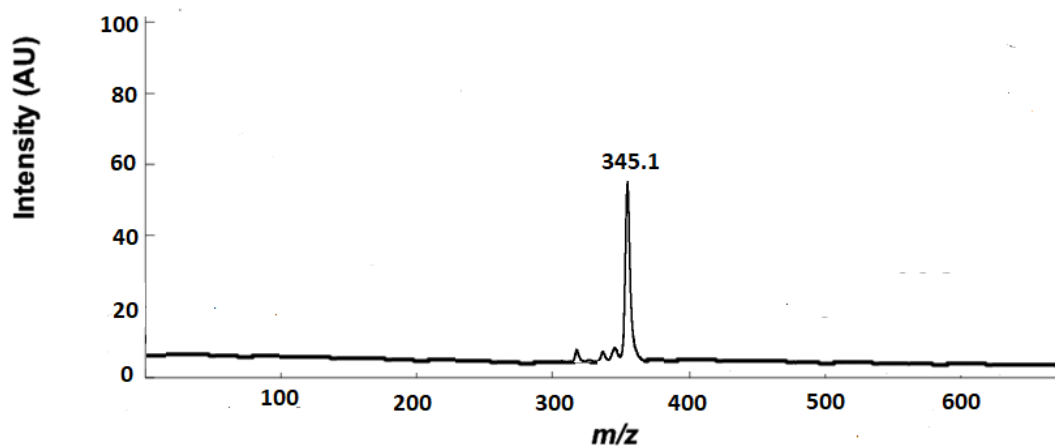

S3 MALDI spectra of 2a

Kratos Kompact MALDi 2 V5.2.4:+ Linear Low Power 134,P.Ext@5000(bin 544)  
100% = 22mV[sum=2154mV] Profiles 1-97 Smooth Sv-GI 1-Baseline 100

POS DHB ibrahim 2b

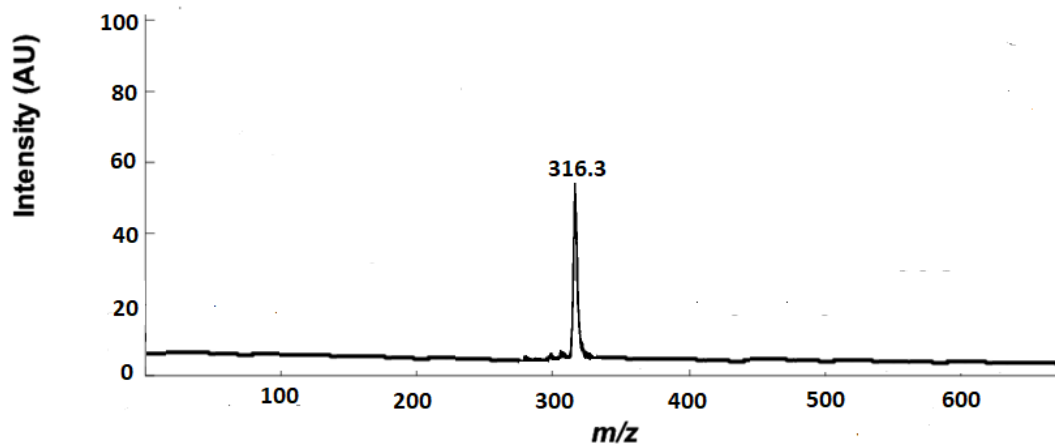

S4 MALDI spectra of 2b

Kratos Kompact MALDi 2 V5.2.4:+ Linear Low Power 134,P.Ext@5000(bin 544)  
100% = 22mV[sum=2154mV] Profiles 1-97 Smooth Sv-GI 1-Baseline 100

POS DHB ibrahim 2C

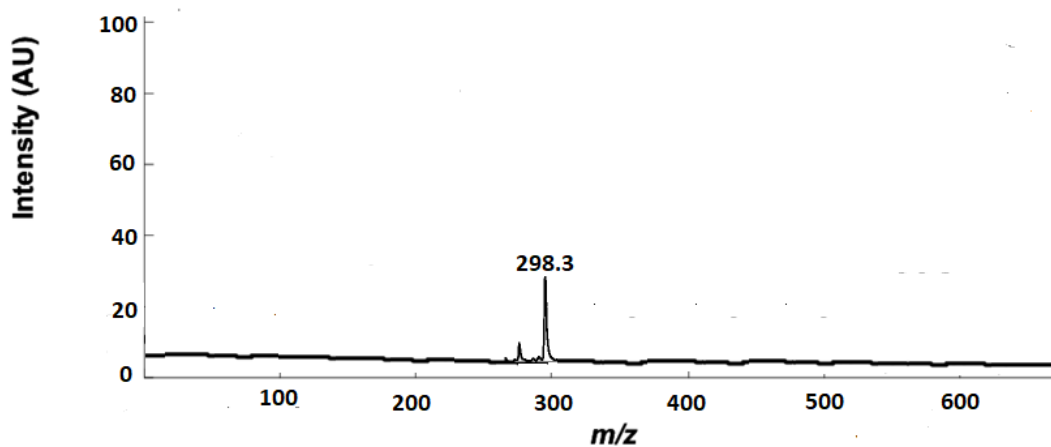

S5 MALDI spectra of 2c

Kratos Kompact MALDi 2 V5.2.4:+ Linear Low Power 134,P.Ext@5000(bin 544)  
100% = 22mV[sum=2154mV] Profiles 1-97 Smooth Sv-GI 1-Baseline 100

POS DHB ibrahim 3

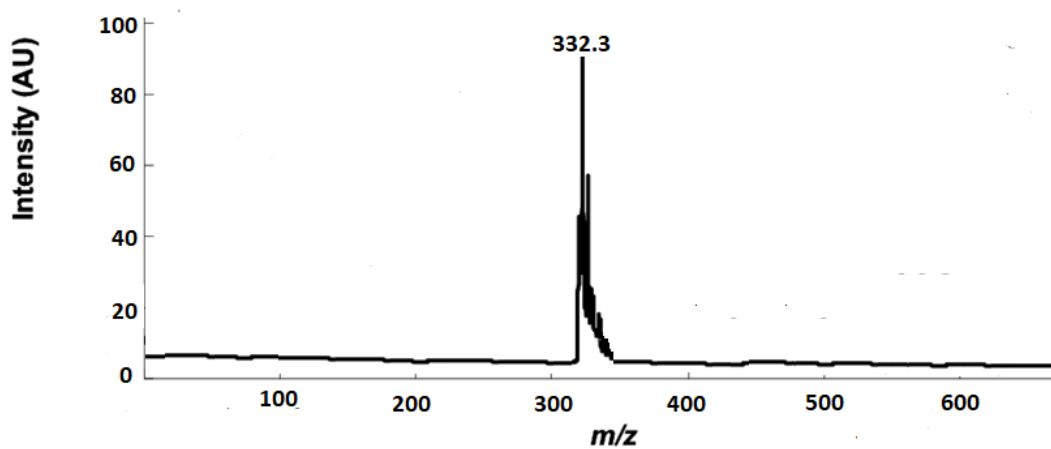

S6 MALDI spectra of 3

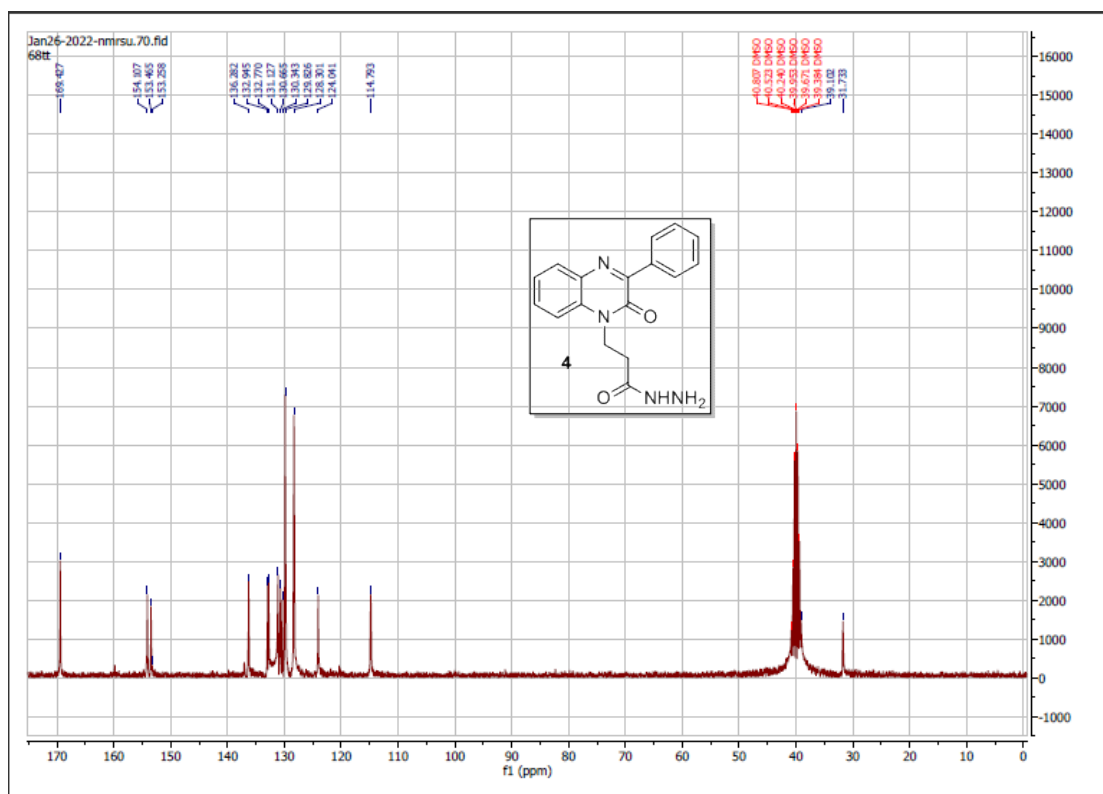

S7  $^{13}\text{C}$  NMR spectra of 4

Kratos Kompact MALDi 2 V5.2.4:+ Linear Low Power 134,P.Ext@5000(bin 544)  
100% = 22mV[sum=2154mV] Profiles 1-97 Smooth Sv-Gl 1-Baseline 100

POS DHB ibrahim 4

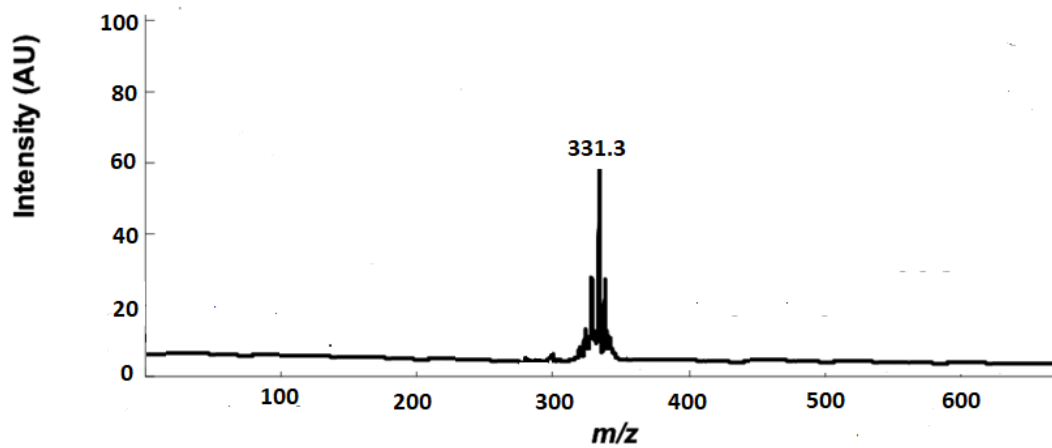

S8 MALDI spectra of 4

Kratos Kompact MALDi 2 V5.2.4:+ Linear Low Power 134,P.Ext@5000(bin 544)  
100% = 22mV[sum=2154mV] Profiles 1-97 Smooth Sv-GI 1-Baseline 100

POS DHB ibrahim 5a

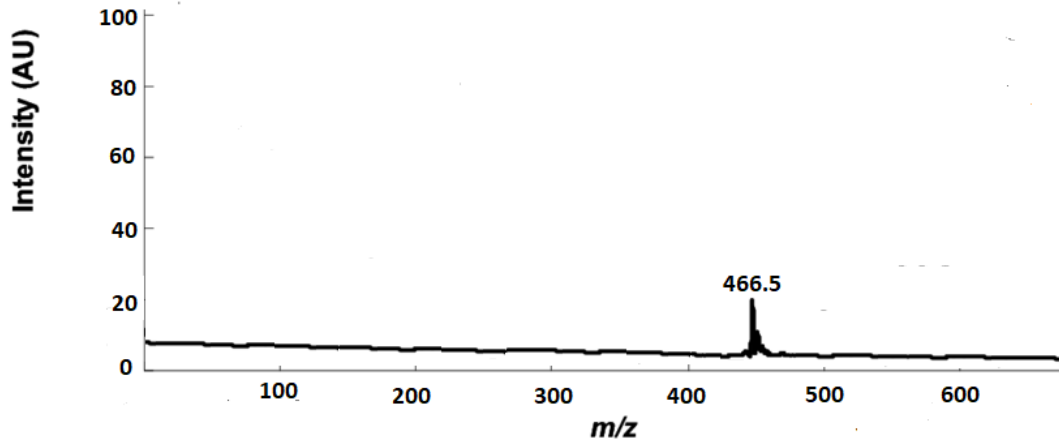

S9 MALDI spectra of 5a

Kratos Kompact MALDi 2 V5.2.4:+ Linear Low Power 134,P.Ext@5000(bin 544)  
100% = 22mV[sum=2154mV] Profiles 1-97 Smooth Sv-GI 1-Baseline 100

POS DHB ibrahim 5b

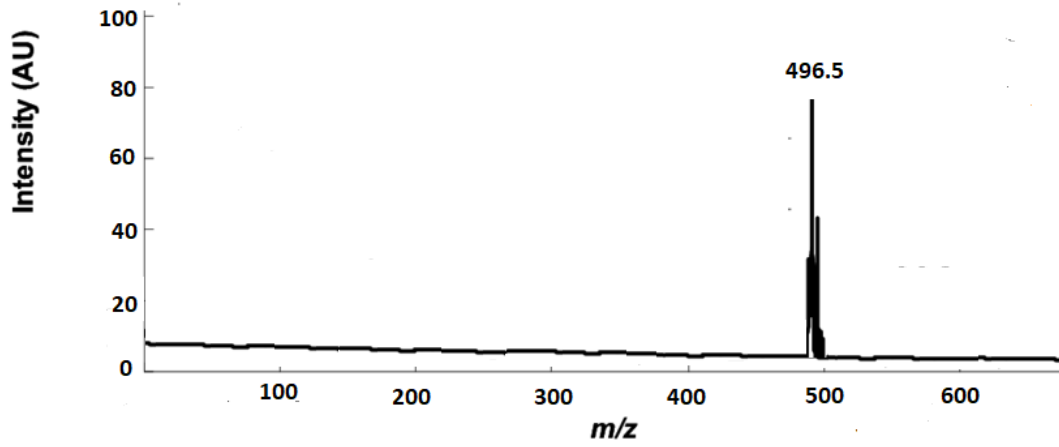

S10 MALDI spectra of 5b

Kratos Kompact MALDi 2 V5.2.4:+ Linear Low Power 134,P.Ext@5000(bin 544)  
100% = 22mV[sum=2154mV] Profiles 1-97 Smooth Sv-Gl 1-Baseline 100

POS DHB ibrahim 5C

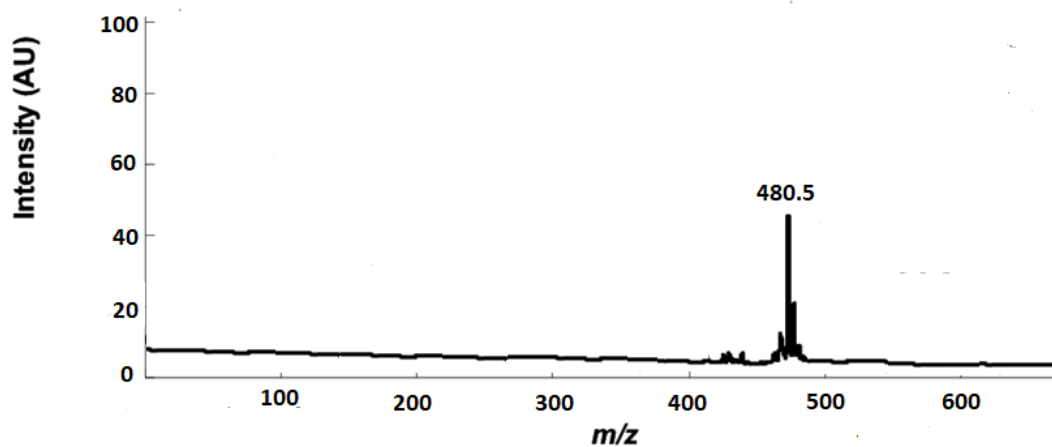

S11 MALDI spectra of 5c

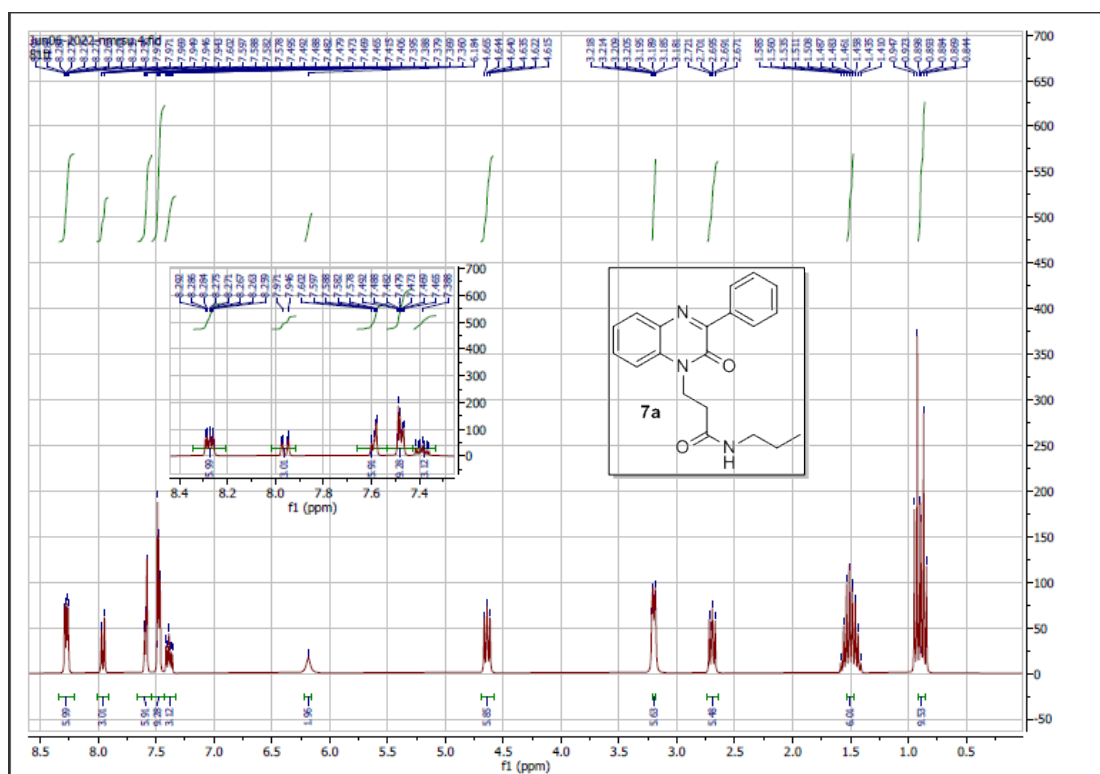

S12 <sup>1</sup>H NMR spectra of 7a

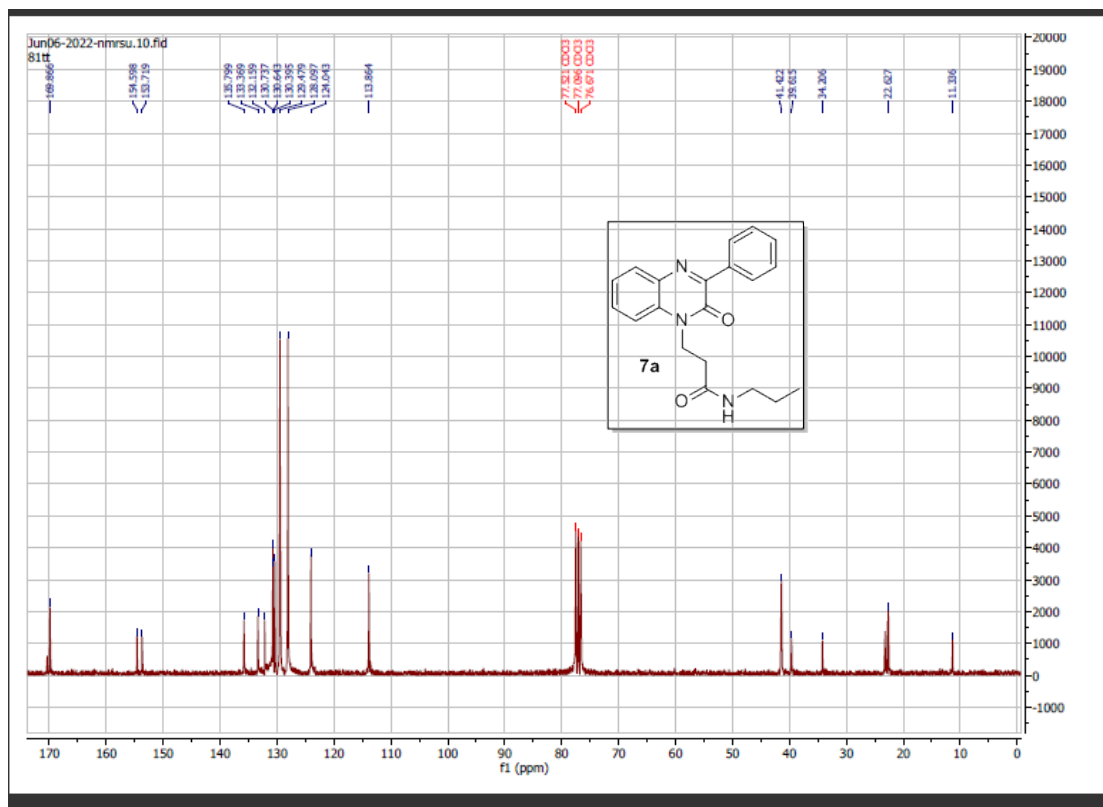

S13  $^{13}\text{C}$ NMR spectra of 7a

Kratos Compact MALDi 2 V5.2.4:+ Linear Low Power 134,P.Ext@5000(bin 544)

100% = 22mV[sum=2154mV] Profiles 1-97 Smooth Sv-Gl 1-Baseline 100

POS DHB ibrahim 7a

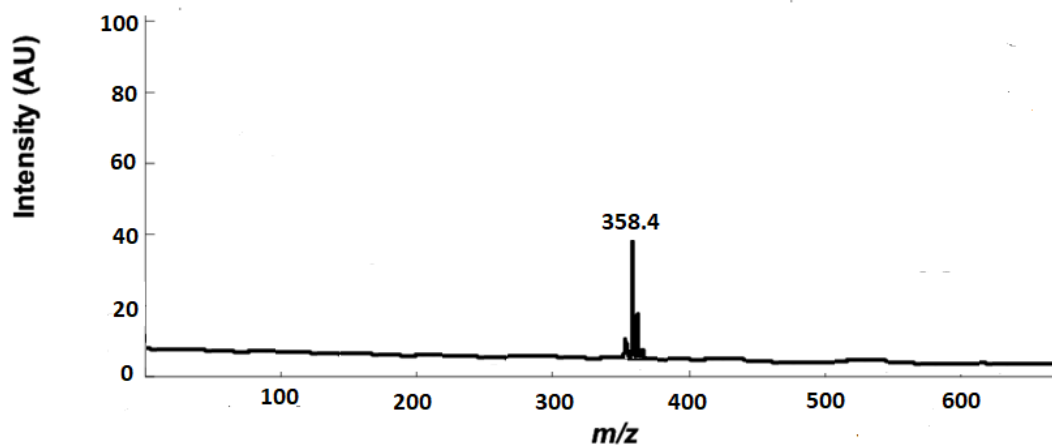

S14 MALDI spectra of 7a

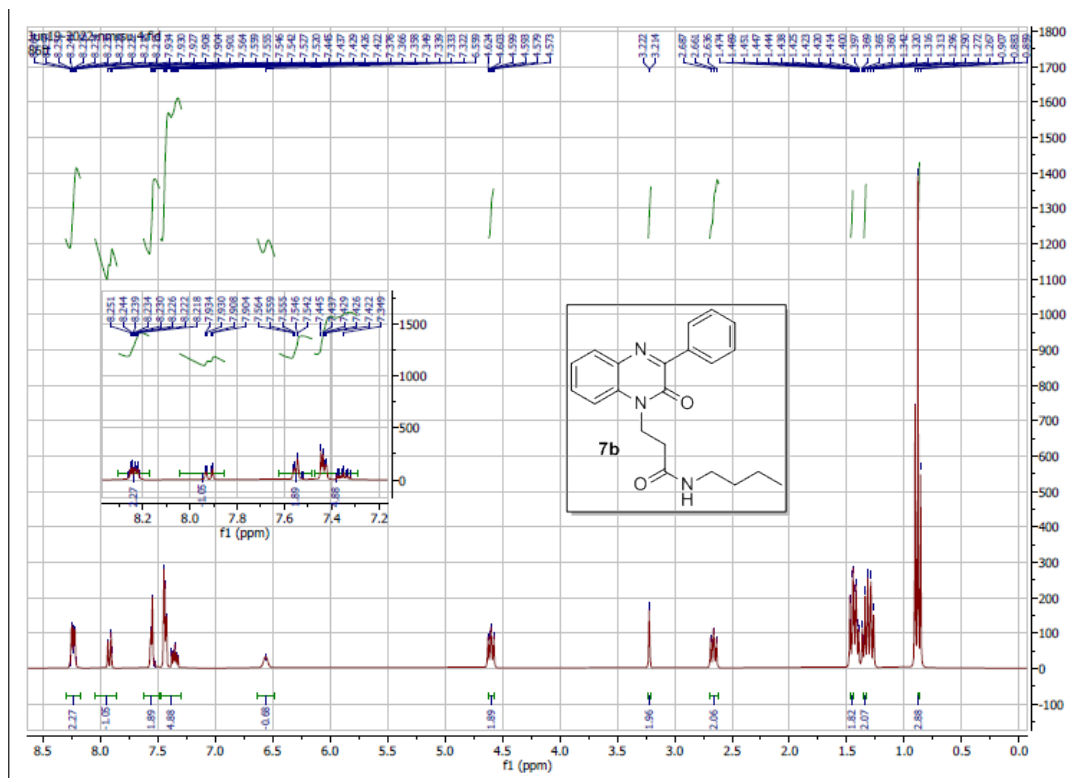

$^{15}\text{N}$  NMR spectra of 7b

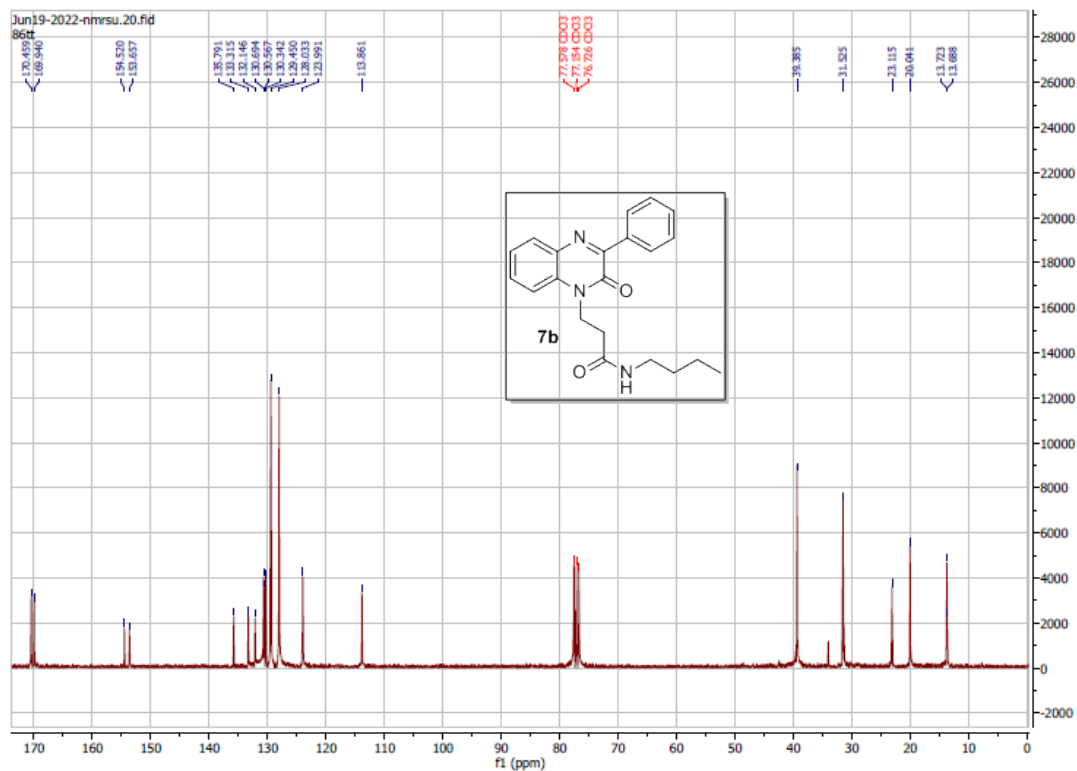

$^{13}\text{C}$  NMR spectra of 7b



Kratos Kompact MALDi 2 V5.2.4:+ Linear Low Power 134,P.Ext@5000(bin 544)  
100% = 22mV[sum=2154mV] Profiles 1-97 Smooth Sv-GI 1-Baseline 100

POS DHB ibrahim 7b

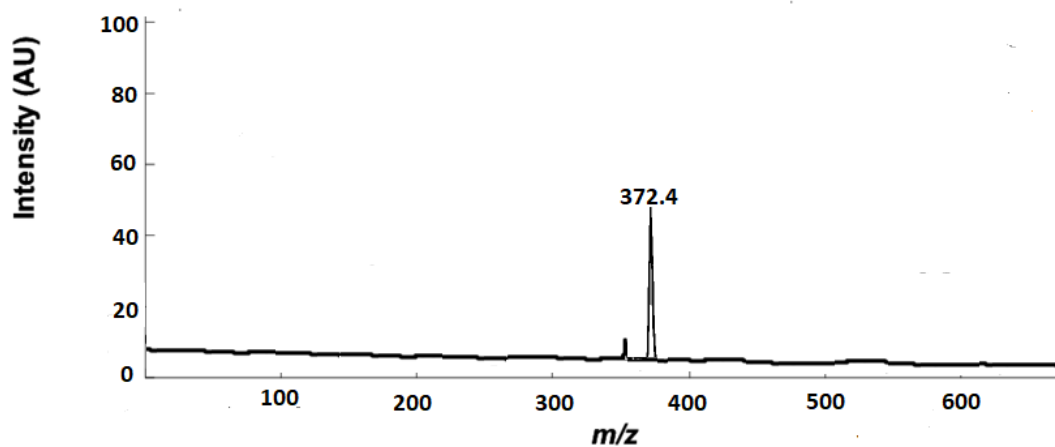

S17 MALDI spectra of 7b

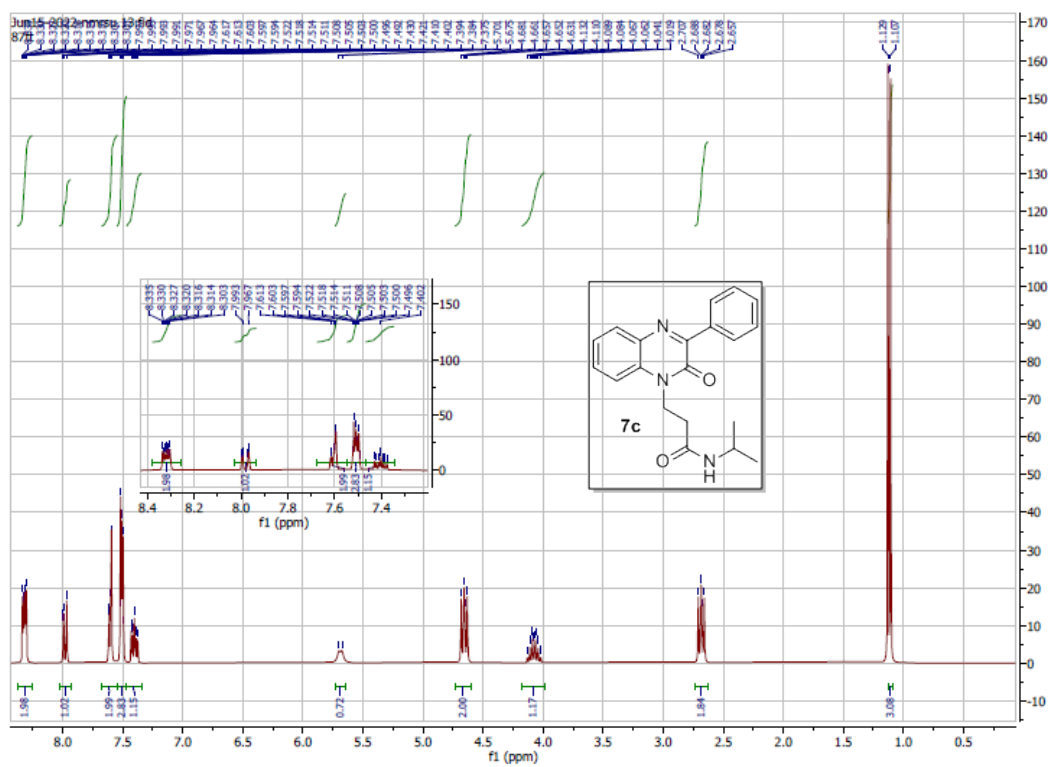

S18 <sup>1</sup>H NMR spectra of 7c

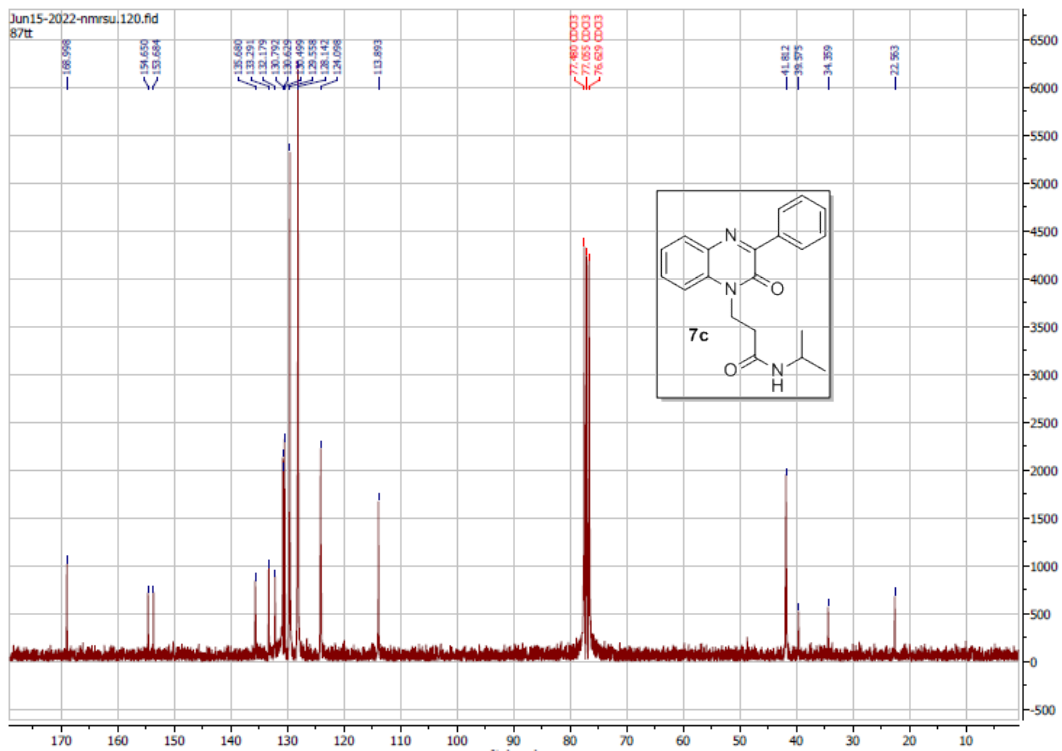

S19  $^{13}\text{C}$ NMR spectra of 7c

Kratos Kompact MALDI 2 V5.2.4:+ Linear Low Power 134,P.Ext@5000(bin 544)  
100% = 22mV[sum=2154mV] Profiles 1-97 Smooth Sv-Gl 1-Baseline 100

POS DHB ibrahim7C

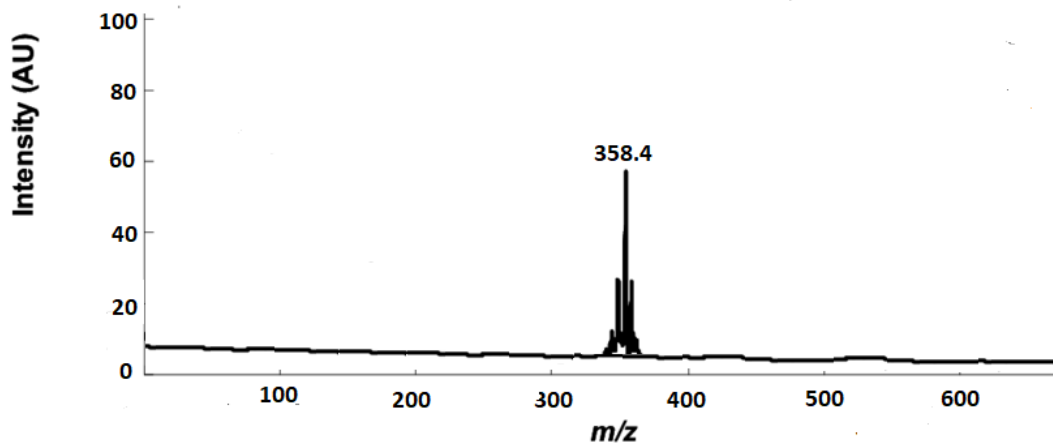

S20 MALDI spectra of 7c

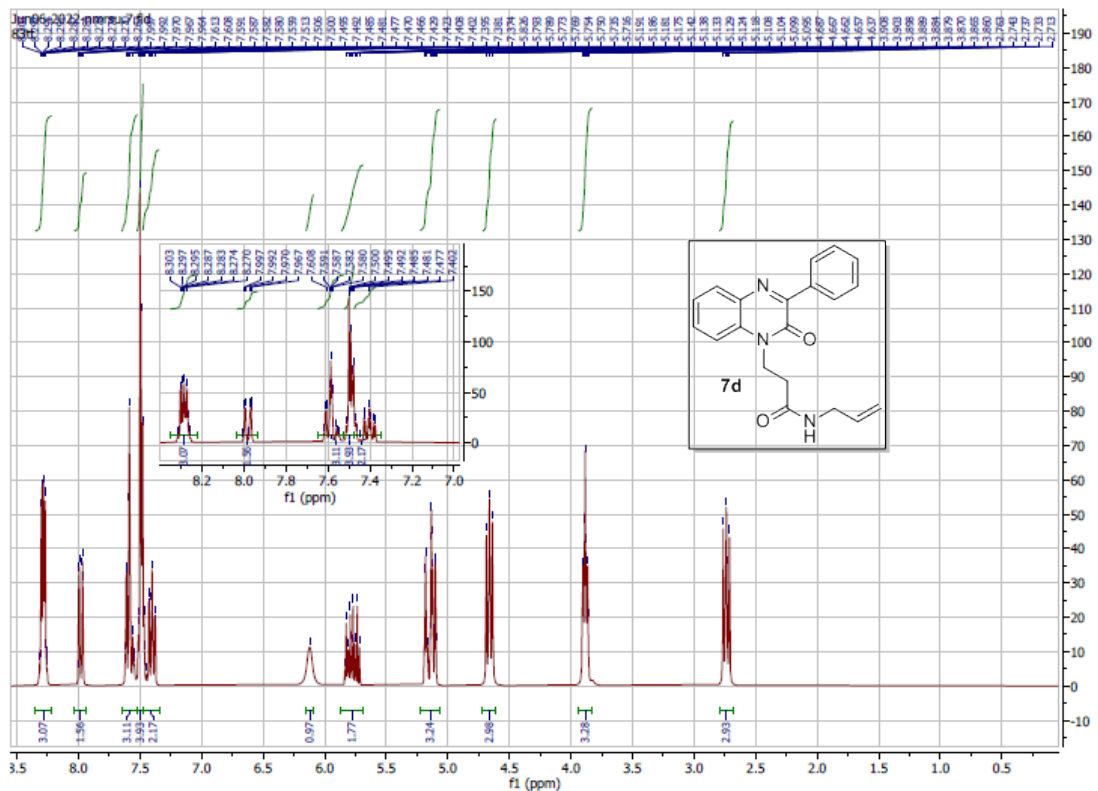

S21  $^1\text{H NMR}$  spectra of 7d

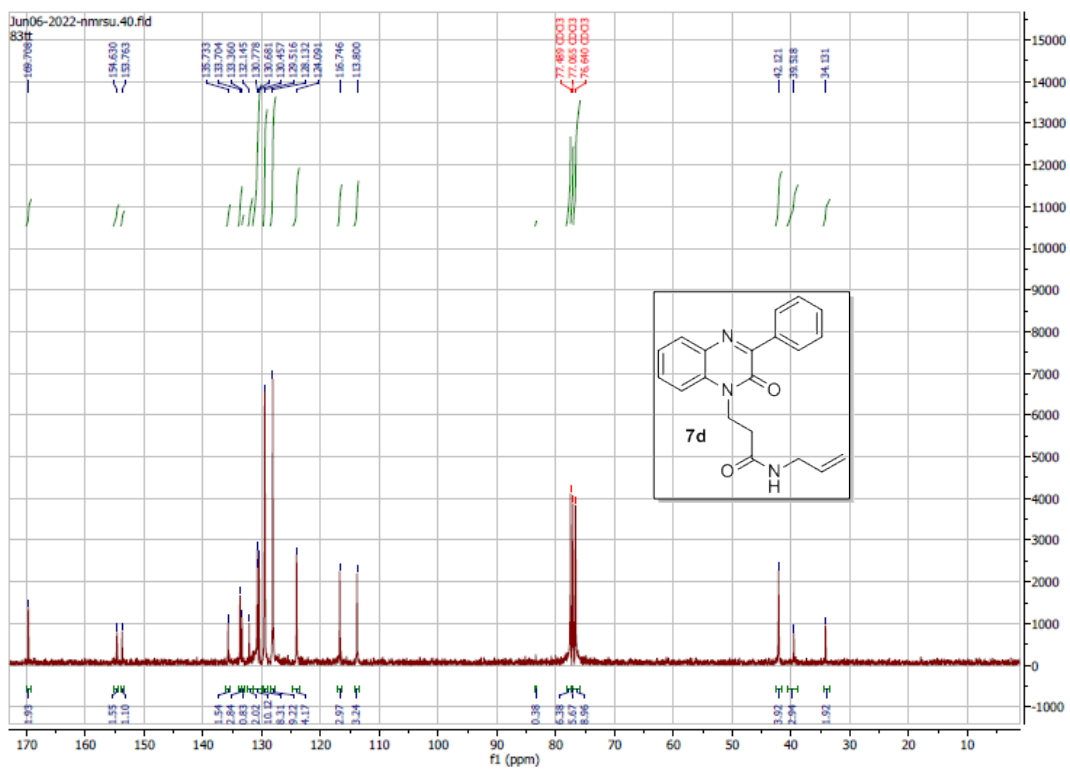

S22  $^{13}\text{C NMR}$  spectra of 7d

Kratos Kompact MALDi 2 V5.2.4:+ Linear Low Power 134,P.Ext@5000(bin 544)  
100% = 22mV[sum=2154mV] Profiles 1-97 Smooth Sv-Gl 1-Baseline 100

POS DHB ibrahim 7d

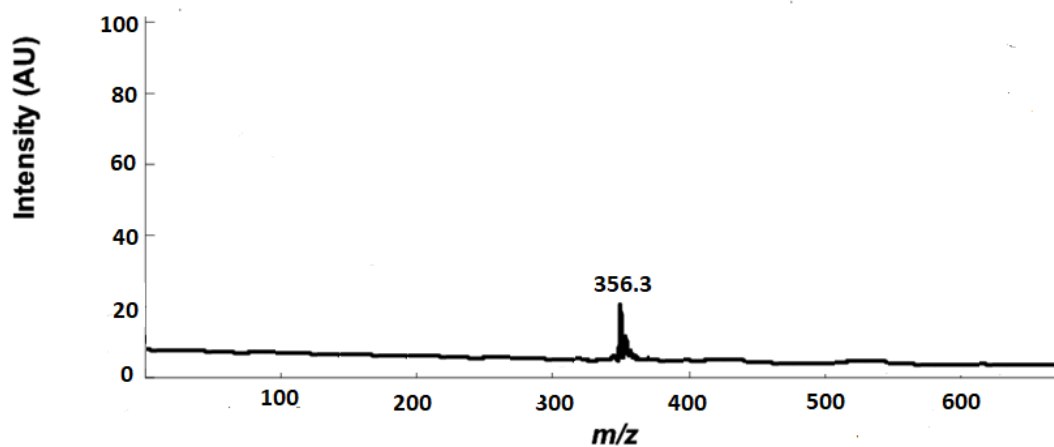

S23 MALDI spectra of 7d

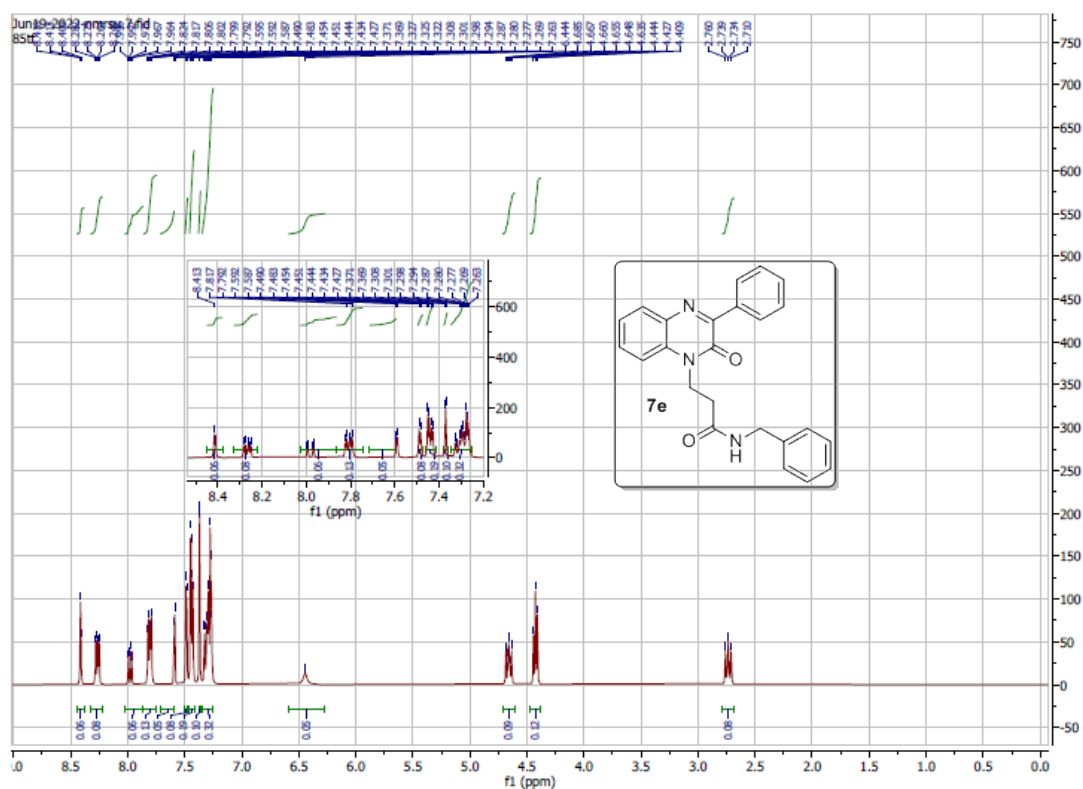

S24 <sup>1</sup>H NMR spectra of 7e

Kratos Kompact MALDi 2 V5.2.4:+ Linear Low Power 134,P.Ext@5000(bin 544)  
100% = 22mV[sum=2154mV] Profiles 1-97 Smooth Sv-Gl 1-Baseline 100

POS DHB ibrahim 7e

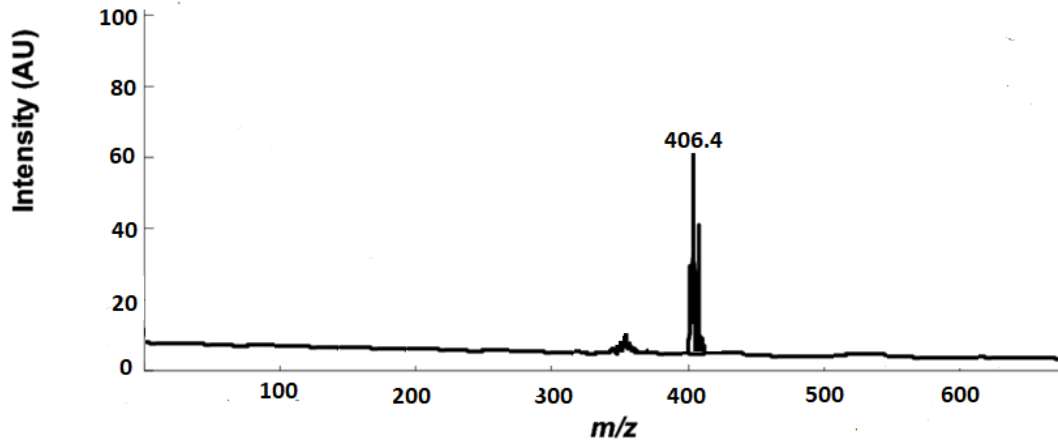

S25 MALDI spectra of 7e

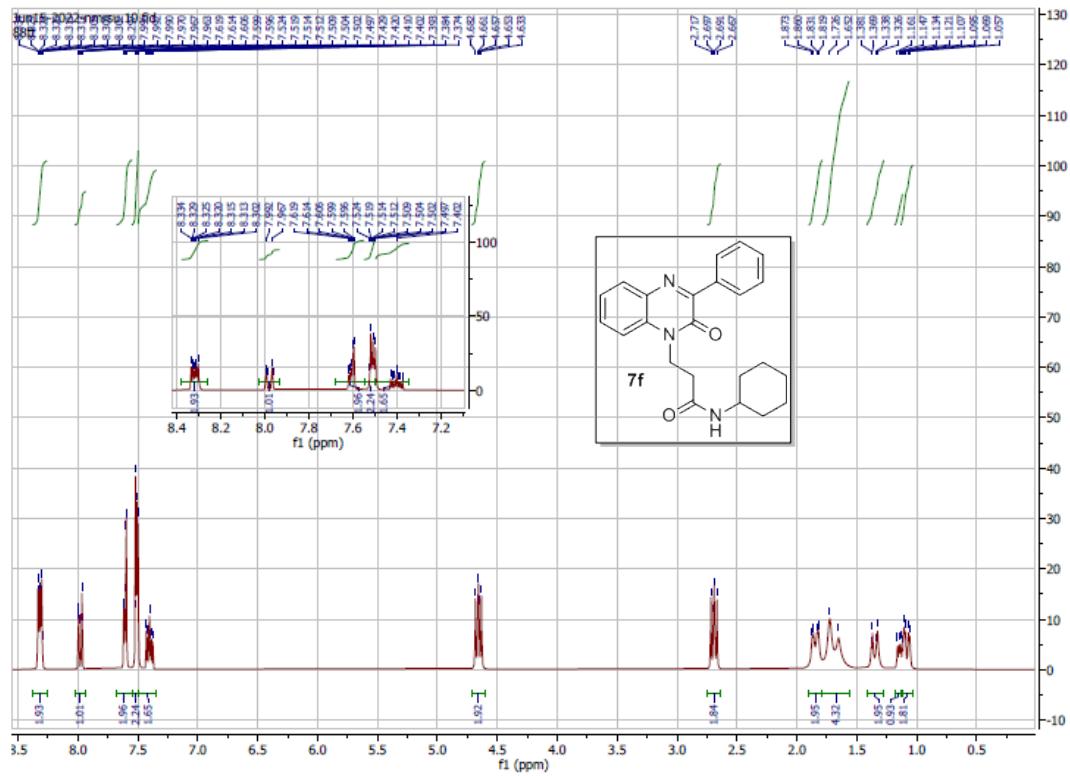

S26 <sup>1</sup>H NMR spectra of 7f

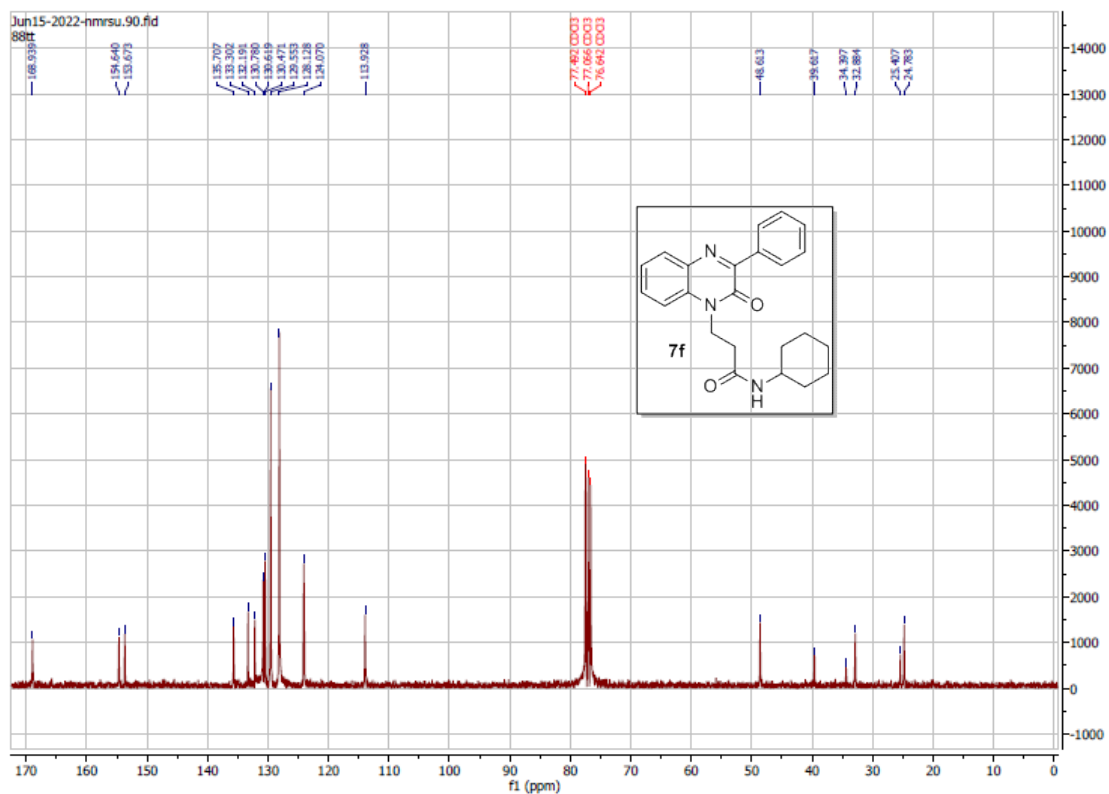

S27  $^{13}\text{C}$ NMR spectra of 7f

Kratos Compact MALDi 2 V5.2.4:+ Linear Low Power 134,P.Ext@5000(bin 544)

100% = 22mV[sum=2154mV] Profiles 1-97 Smooth Sv-Gl 1-Baseline 100

POS DHB ibrahim 7f

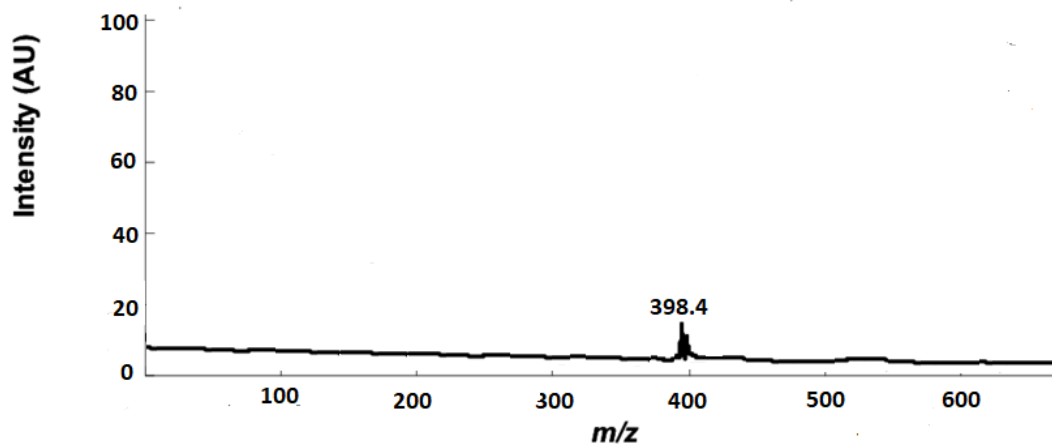

S28 MALDI spectra of 7f

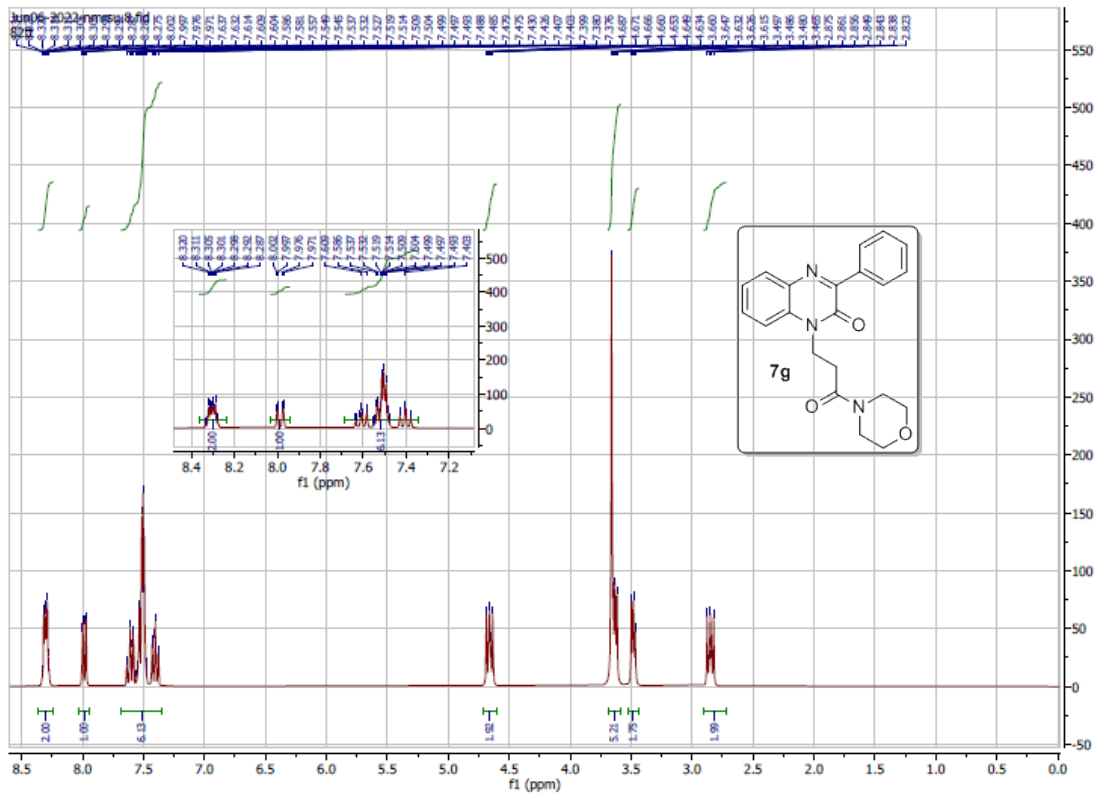

S29  $^1\text{H}$ NMR spectra of 7g

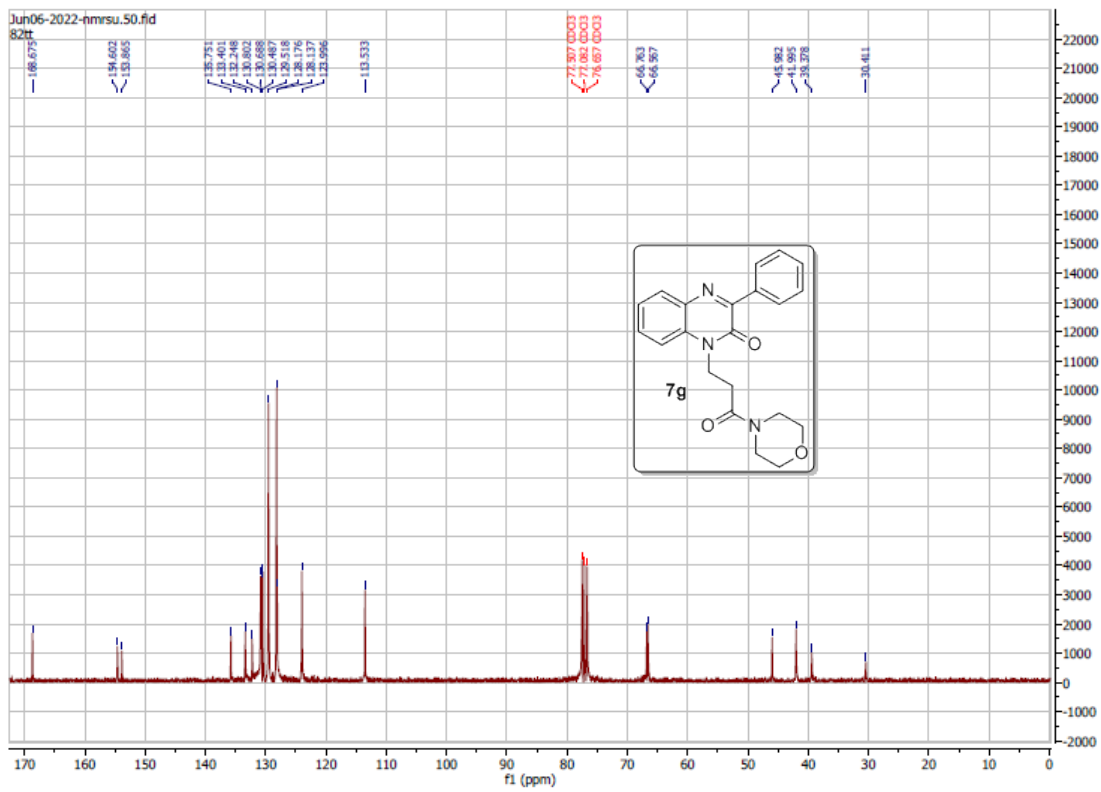

S30  $^{13}\text{C}$ NMR spectra of 7g

Kratos Kompact MALDI 2 V5.2.4:+ Linear Low Power 134,P.Ext@5000(bin 544)  
100% = 22mV[sum=2154mV] Profiles 1-97 Smooth Sv-GI 1-Baseline 100

POS DHB ibrahim 7g

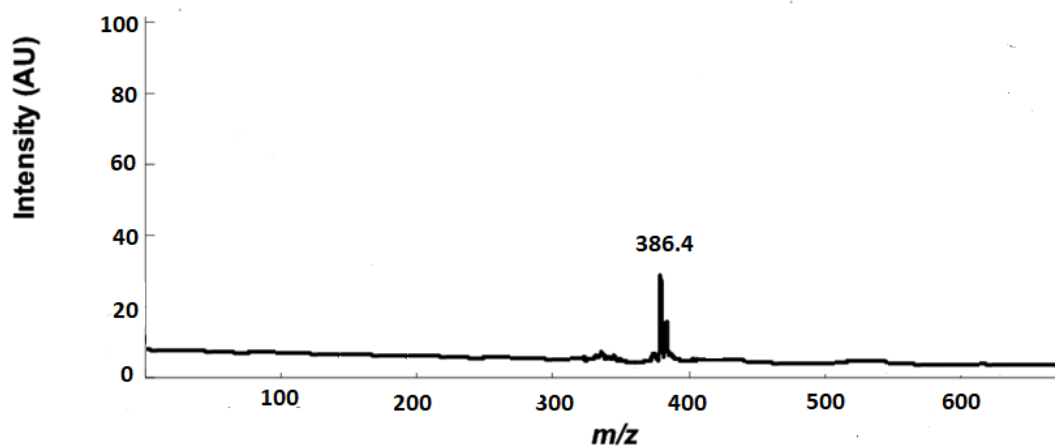

S31 MALDI spectra of 7g

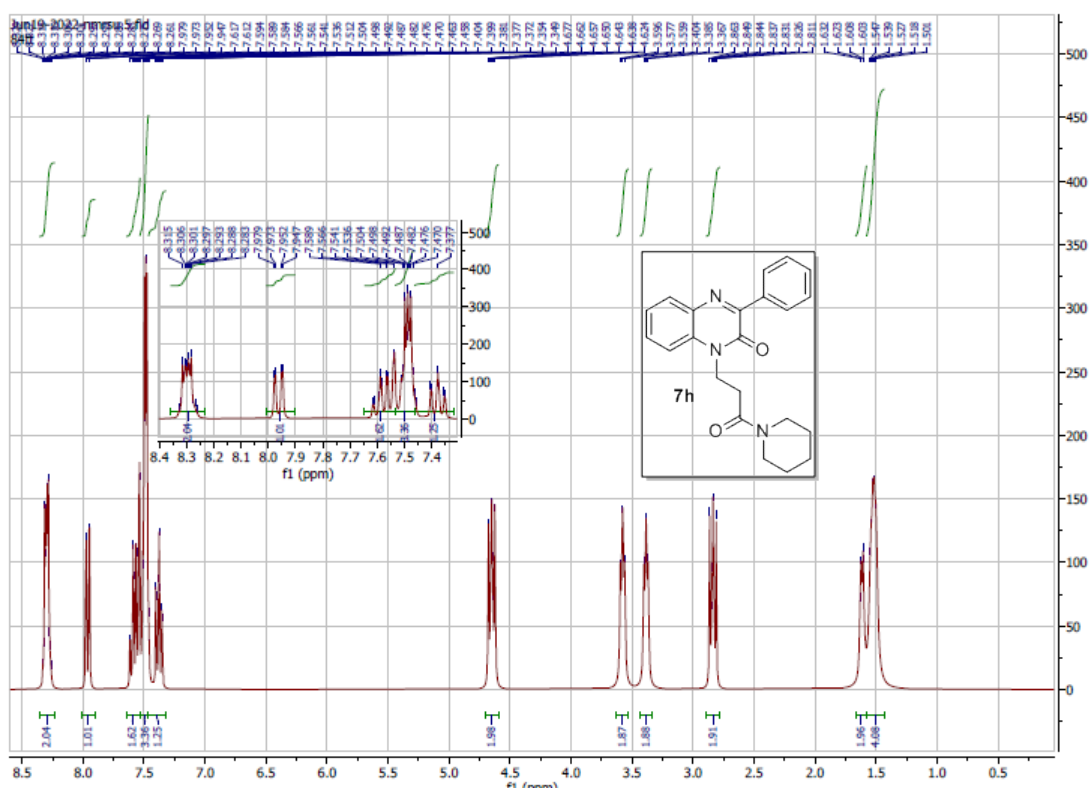

S32<sup>1</sup>H NMR spectra of 7h



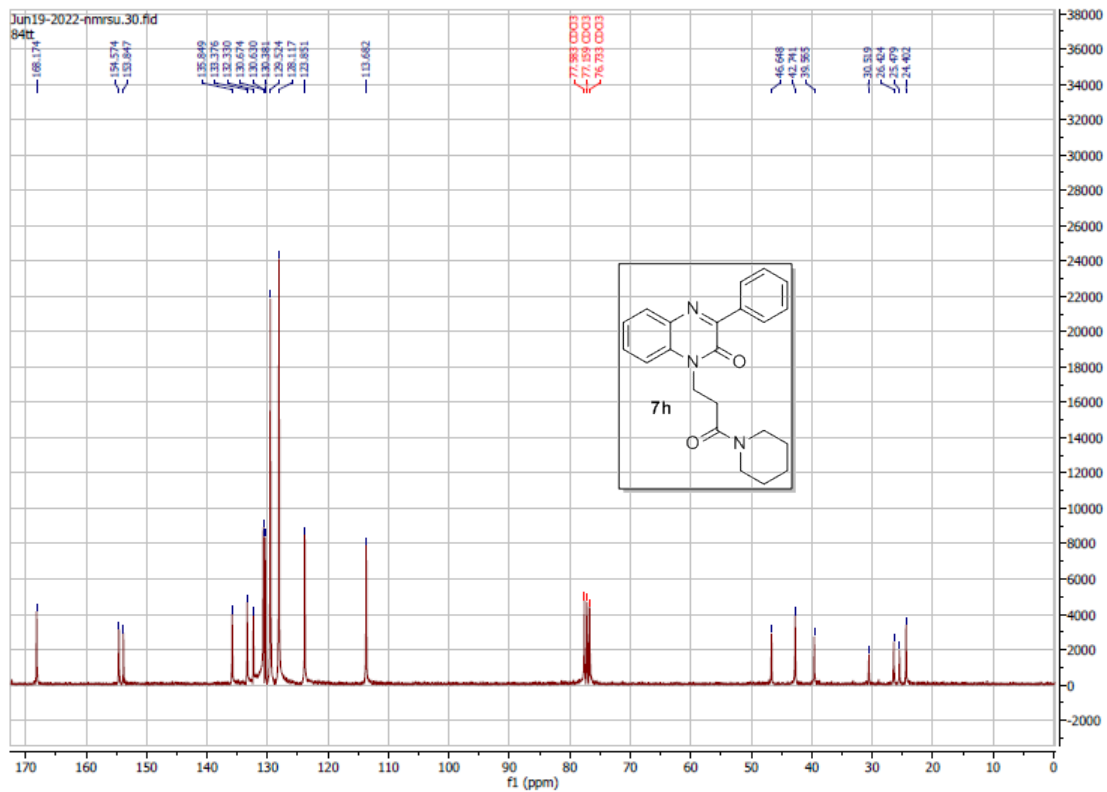

S33  $^{13}\text{C}$ NMR spectra of 7h

Kratos Kompact MALDi 2 V5.2.4:+ Linear Low Power 134,P.Ext@5000(bin 544)  
100% = 22mV[sum=2154mV] Profiles 1-97 Smooth Sv-Gl 1-Baseline 100

POS DHB ibrahim 7h

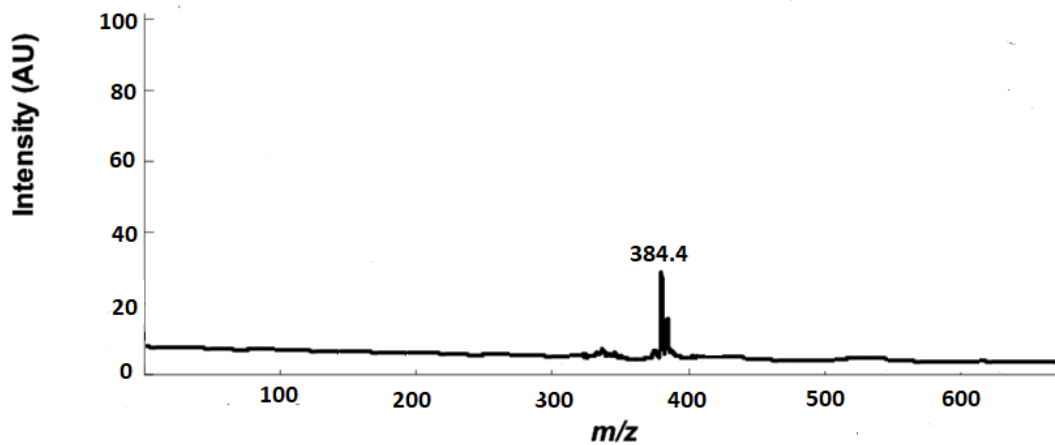

S34 MALDI spectra of 7h

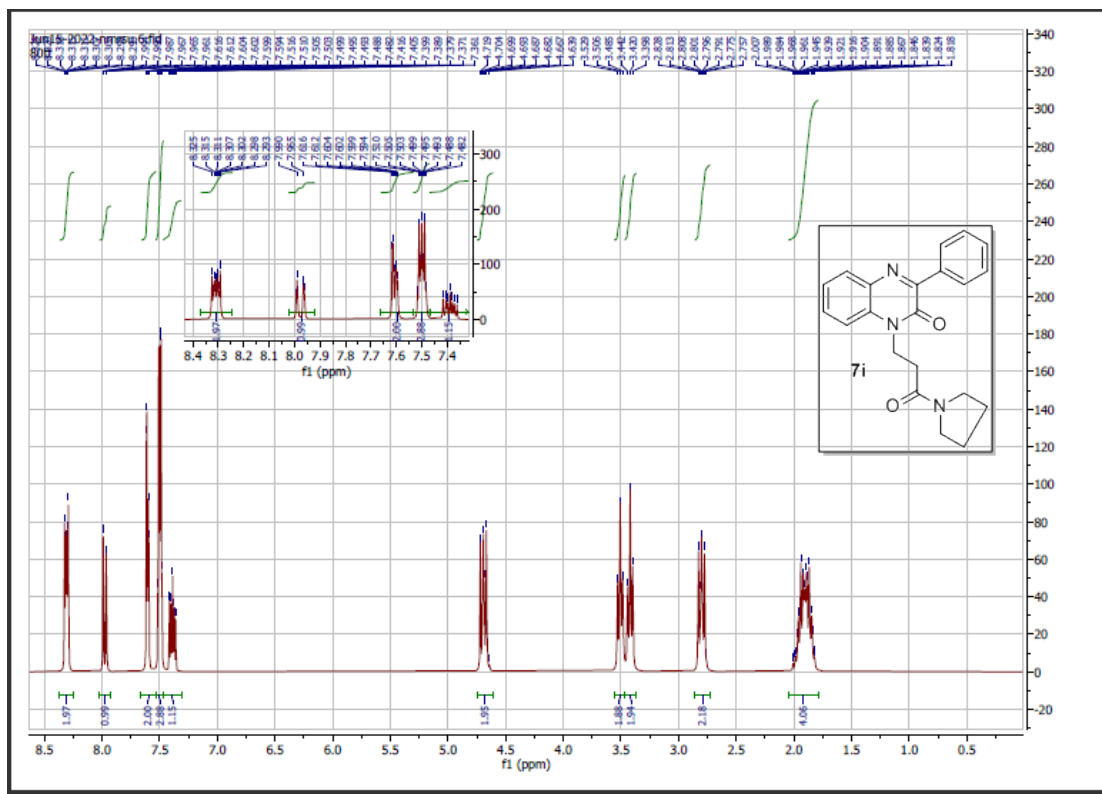

S35 <sup>1</sup>H NMR spectra of 7i

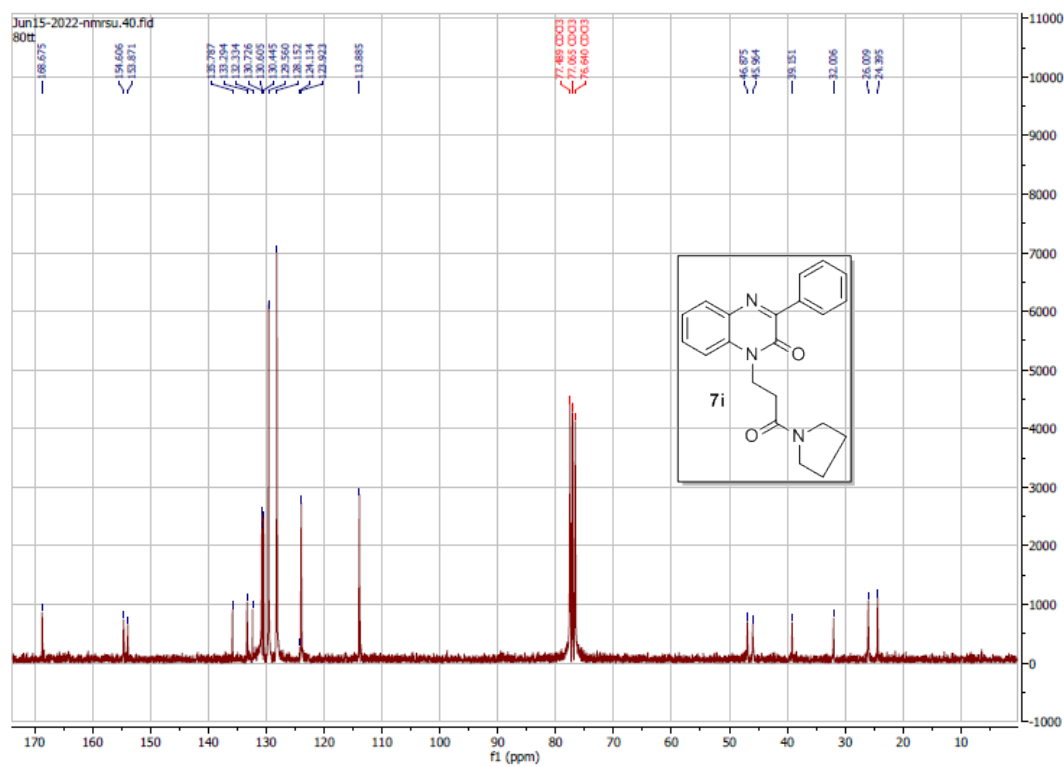

S36 <sup>13</sup>C NMR spectra of 7i

Kratos Kompact MALDI 2 V5.2.4:+ Linear Low Power 134,P.Ext@5000(bin 544)  
 100% = 22mV[sum=2154mV] Profiles 1-97 Smooth Sv-Gl 1-Baseline 100

POS DHB ibrahim 7i

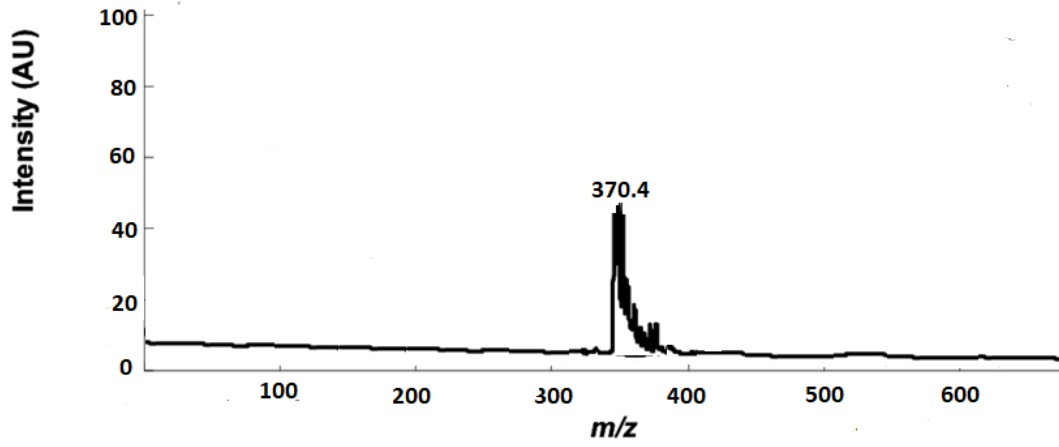

S37 MALDI spectra of 7i

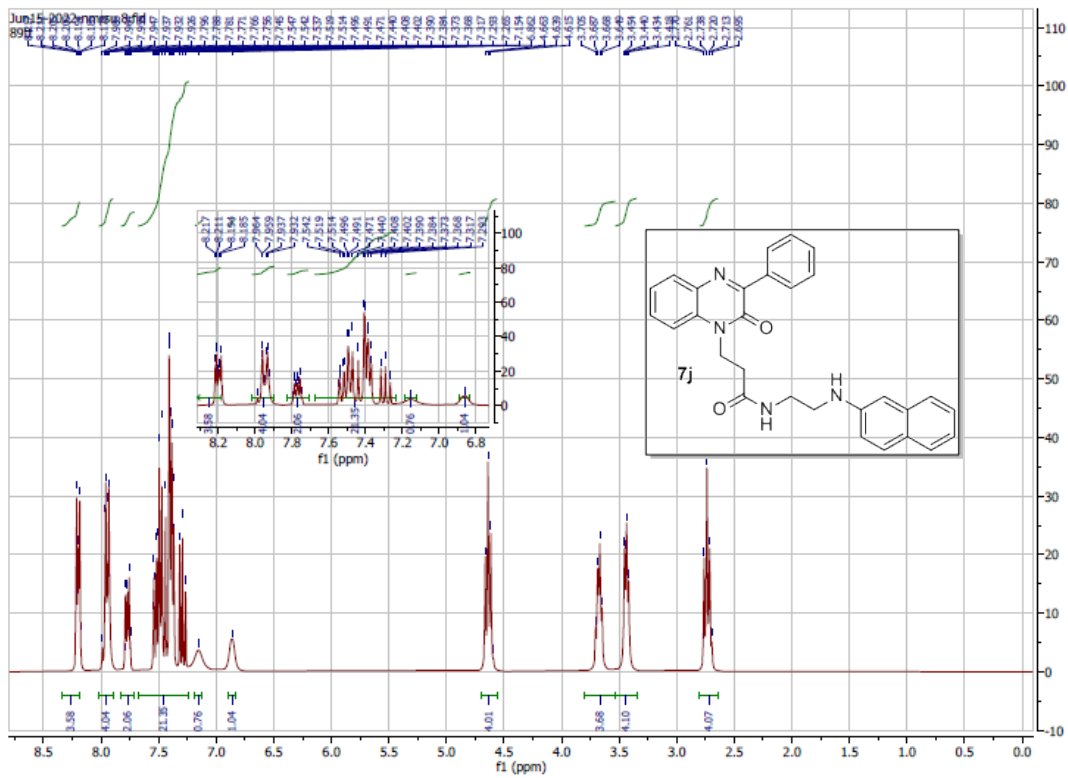

S38 <sup>1</sup>H NMR spectra of 7j

Kratos Kompact MALDI 2 V5.2.4:+ Linear Low Power 134,P.Ext@5000(bin 544)  
100% = 22mV[sum=2154mV] Profiles 1-97 Smooth Sv-Gl 1-Baseline 100

POS DHB ibrahim 7j

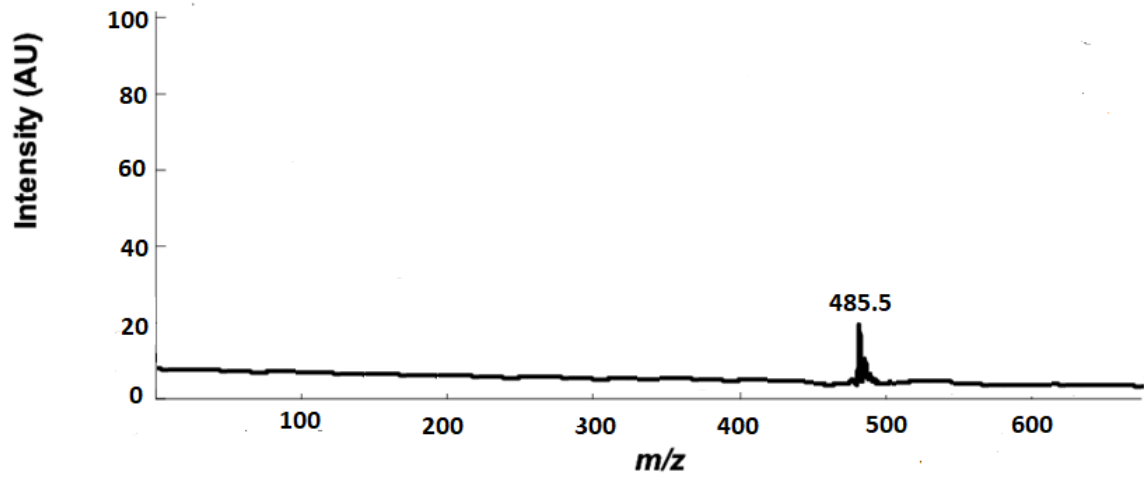

S39 MALDI spectra of 7j
